# Supplementary material
Source: publisher figshare collection journal article supplement (https://karger.figshare.com/ndownloader/files/25307852)
Supplement: Supplementary file 1 [file 25307852]

# Supplementary information for

**The identification of gene expression profiles associated with granulomatous mastitis**

Qiang Zhu*1, Lin Wang1, Pilin Wang*1

1Department of Breast Surgery. Beijing Tiantan Hospital, Capital Medical University, Beijing, People's Republic of China


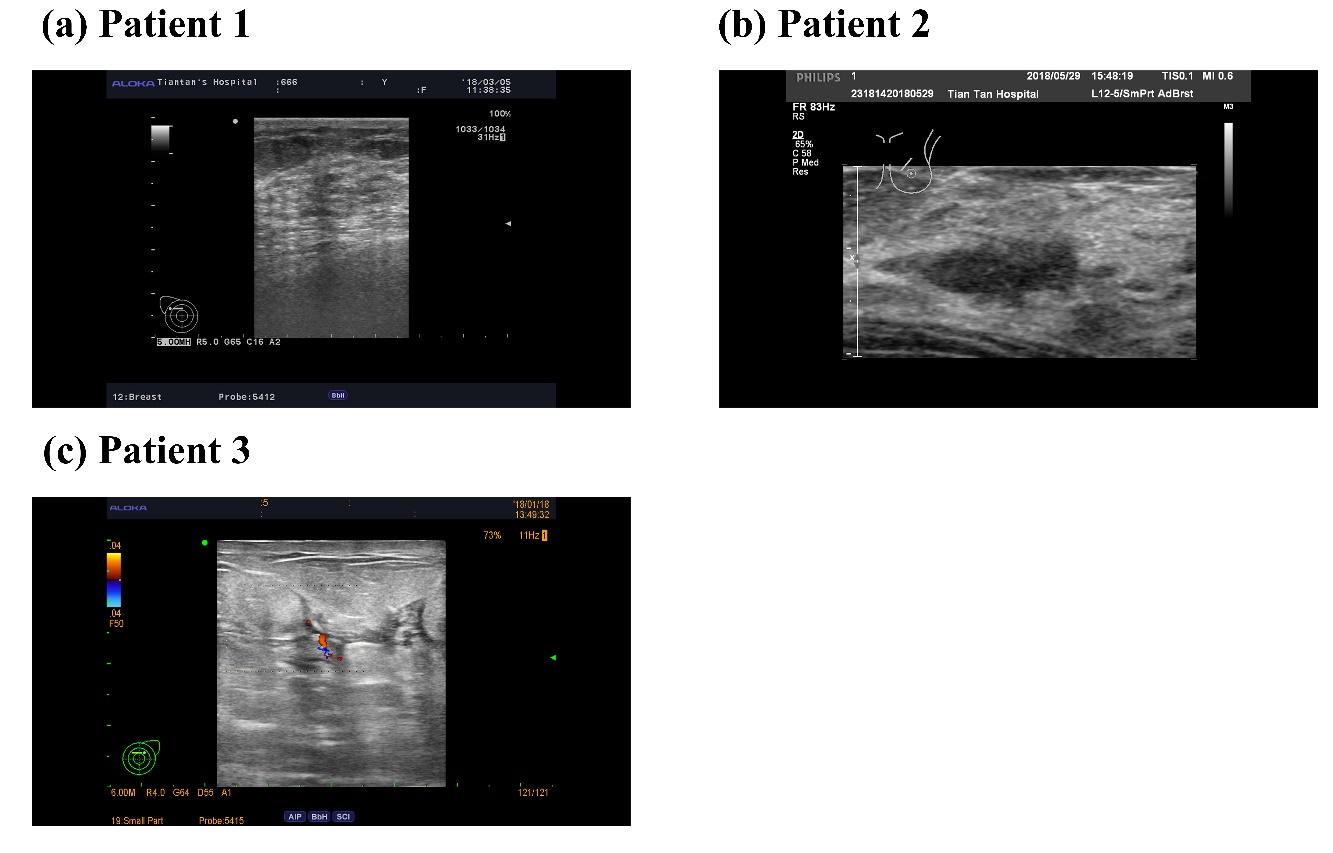


**Figure S1.** The ultrasonography of three patients
